# Supplementary material
Source: Springer Nature journal article supplement (https://www.springermedizin.de/resource/supplementary/12968_2013_3341_MOESM11_ESM.pdf/9583666)

Off-Resonance Frequency [Hz]

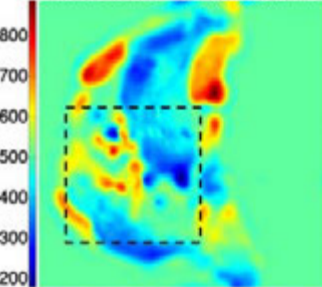

Uncorrected Image

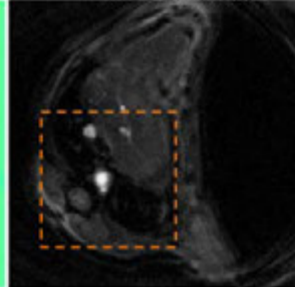

Corrected Image

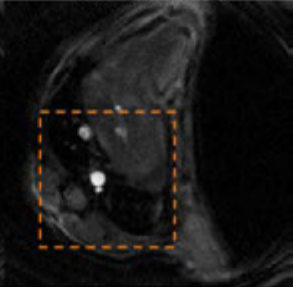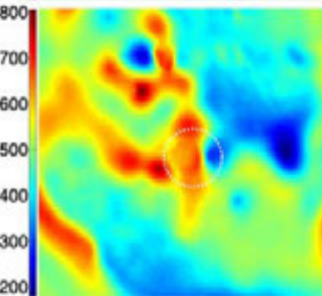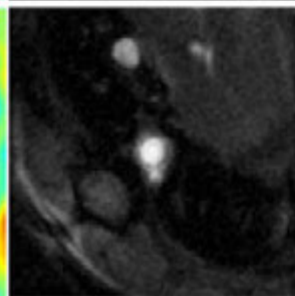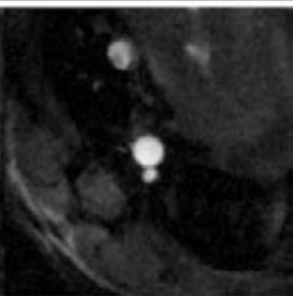

Supplement: MOESM11 [file 9583666]
